# Supplementary material for: Exploring Ocimum basilicum’s Secondary Metabolites: Inhibition and Molecular Docking against Rhynchophorus ferrugineus for Optimal Action
Source: MDPI journal article supplement (doi:10.3390/plants13040491), 2024-02-08
Supplement: s1 [file s1]

## Supplementary Materials

**Table S1.** Callus and cell suspension weights from *O. basilicum* grown on synthetic solid MS and liquid LS medium at various phases of growth without or with *V. dahliae* infection.

| Age (days) | Callus Weight (g) per Petri dish |                          | Cell Suspension Weight (g) per 200 mL media |                         |
|------------|----------------------------------|--------------------------|---------------------------------------------|-------------------------|
|            | Without Infection                | With Infection           | Without Infection                           | With Infection          |
| 5          | 2.47 <sup>l</sup> ±0.14          | 3.68 <sup>k</sup> ±0.03  | 2.14 <sup>o</sup> ±0.06                     | 2.67 <sup>m</sup> ±0.03 |
| 10         | 3.54 <sup>k</sup> ±0.23          | 4.53 <sup>j</sup> ±0.03  | 2.47 <sup>n</sup> ±0.04                     | 3.38 <sup>l</sup> ±0.03 |
| 15         | 4.69 <sup>j</sup> ±0.02          | 6.14 <sup>h</sup> ±0.09  | 3.49 <sup>k</sup> ±0.04                     | 4.52 <sup>h</sup> ±0.04 |
| 20         | 5.61 <sup>i</sup> ±0.02          | 6.72 <sup>g</sup> ±0.10  | 3.62 <sup>j</sup> ±0.05                     | 5.17 <sup>g</sup> ±0.05 |
| 25         | 6.51 <sup>g</sup> ±0.09          | 8.51 <sup>d</sup> ±0.11  | 4.45 <sup>i</sup> ±0.06                     | 5.61 <sup>f</sup> ±0.06 |
| 30         | 7.14 <sup>f</sup> ±0.10          | 9.24 <sup>c</sup> ±0.13  | 5.54 <sup>f</sup> ±0.05                     | 6.73 <sup>c</sup> ±0.06 |
| 35         | 7.79 <sup>e</sup> ±0.01          | 10.22 <sup>b</sup> ±0.15 | 5.98 <sup>e</sup> ±0.06                     | 7.59 <sup>b</sup> ±0.07 |
| 40         | 8.94 <sup>d</sup> ±0.10          | 11.29 <sup>a</sup> ±0.17 | 6.63 <sup>d</sup> ±0.08                     | 7.98 <sup>a</sup> ±0.08 |
| F          | 2028                             |                          | 2700                                        |                         |
| Df         | 15.32                            |                          | 15.32                                       |                         |

Numbers represent means standard deviations from three independent tests. The Student-Newman-Keuls (SNK) test shows that values in the same column that are headed by the same letter are not statistically different ( $P \leq 0.0001$  V.H.Sig. for all values). df = degrees of freedom; and F = F-ratio.

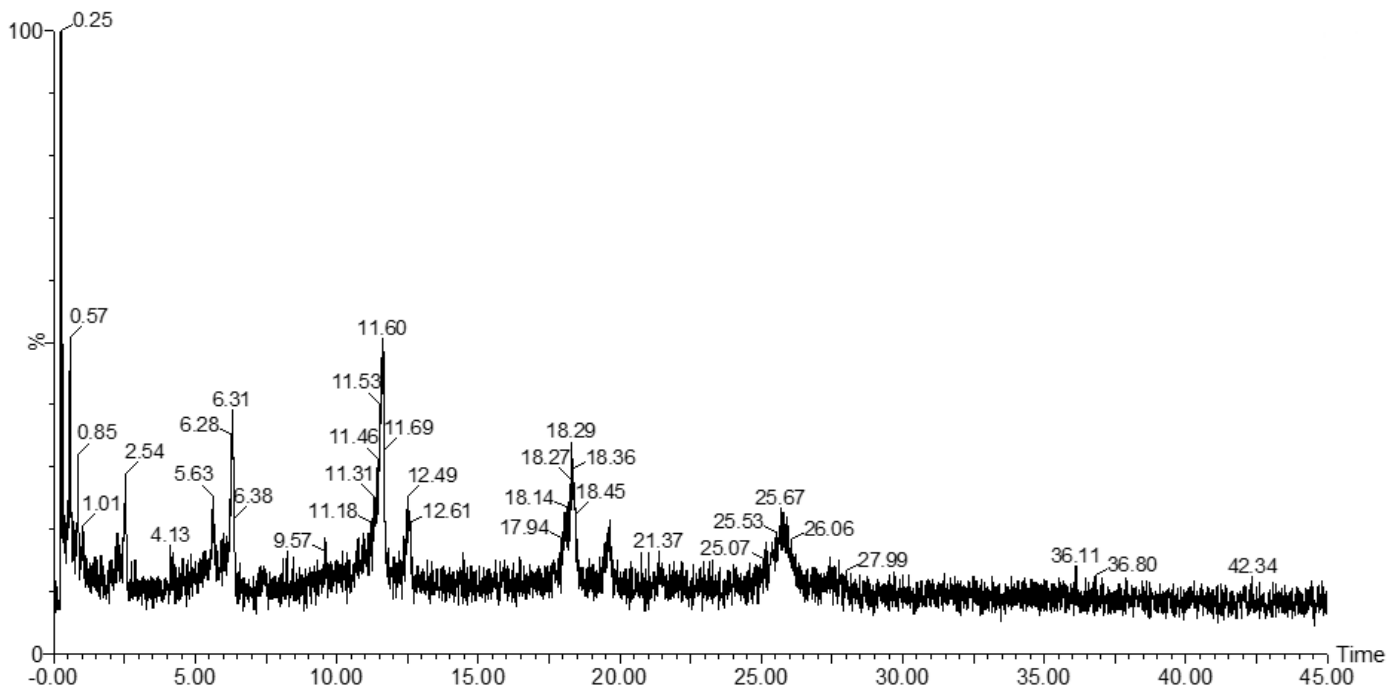

**Figure S1.** The LC-MS chromatogram from cell suspension extracts of *O. basilicum*.

**Table S2.** Docking values and binding interactions of compounds with acetylcholinesterase (AChE) (PDB:1QON)

| Compounds                         | $\Delta G$<br>(kcal/mol) | H-bond (donor-Acceptor) |                    |                 | H-pi or pi-pi bond |                |                 | van der Waals                                                                                                                                                                                                                                                                                                                                                                                                                                                                                               |
|-----------------------------------|--------------------------|-------------------------|--------------------|-----------------|--------------------|----------------|-----------------|-------------------------------------------------------------------------------------------------------------------------------------------------------------------------------------------------------------------------------------------------------------------------------------------------------------------------------------------------------------------------------------------------------------------------------------------------------------------------------------------------------------|
|                                   |                          | Ligand<br>A. A.         | interaction        | Distance<br>(Å) | Ligand<br>A.A      | interaction    | Distance<br>(Å) |                                                                                                                                                                                                                                                                                                                                                                                                                                                                                                             |
| Chicoric acid                     | -8.3067                  | Ser 2085                | H-acceptor         | 3.21            | Trp 83<br>Tyr 337  | pi-pi<br>pi-pi | 3.93<br>3.95    | Tyr 71, Gly 79, Glu 80, Gly 116, Gly 117,<br>Thr 121, Gly 122, Leu 126, Tyr 291, Phe 297,<br>Tyr 341, Asp 342, Trp 439, Leu 446, His 447,<br>Gly 448, and Ile 451                                                                                                                                                                                                                                                                                                                                           |
| Quercetin-3-<br>O-rutinoside      | -8.6174                  | Glu 204                 | H-doner            | 2.81            | Tyr 71             | H-pi           | 4.51            | Tyr 73, Trp 83, Asn 84, Pro 85, Tyr 115, Gly<br>116, Gly 118, Thr 121, Gly 122, Leu 126, Ser<br>205, Trp 288, Tyr 291, Phe 297, Tyr 341, Asp<br>342, Trp 439, Leu 446, His 447, and Ile 451<br>Gln 68, Tyr 71, Gly 79, Glu 80, Ile 82, Trp<br>83, Asn 84, Pro 85, Gly 116, Gly 117, Thr<br>121, Gly 122, Ser 123, Leu 126, Tyr 129, Glu<br>204, Ser 205, Tyr 291, Phe 297, Tyr 337, Phe<br>338, Tyr 341, Asp 342, Thr 434, Thr 436, Ser<br>437, Leu 438, Trp 439, Gly 448, Asp 449, Ile<br>451, and Glu 452 |
|                                   |                          | Glu 204                 | H-doner            | 3.04            | Trp 83             | pi-pi          | 3.74            |                                                                                                                                                                                                                                                                                                                                                                                                                                                                                                             |
|                                   |                          | Gly 117                 | H-acceptor         | 3.19            | Tyr 337            | pi-pi          | 3.61            |                                                                                                                                                                                                                                                                                                                                                                                                                                                                                                             |
| Salvianolic<br>acid B             | -7.5902                  | Asp 449                 | H-doner            | 2.81            | Trp 83             | pi-H           | 3.89            | Tyr 71, Glu 80, Trp 83, Gly 117, Gly 118,<br>Thr 121, Glu 204, Ser 205, Tyr 291, Leu 295,<br>Phe 297, Tyr 337, Phe 338, Leu 446, and His<br>447                                                                                                                                                                                                                                                                                                                                                             |
|                                   |                          | Trp 83                  | H-doner            | 2.70            | Leu 438            | pi-H           | 4.09            |                                                                                                                                                                                                                                                                                                                                                                                                                                                                                                             |
|                                   |                          |                         |                    |                 | Trp 83             | pi-pi          | 3.79            |                                                                                                                                                                                                                                                                                                                                                                                                                                                                                                             |
| Rosmarinic<br>acid                | -7.3476                  | ASN 84,<br>ASP 342      | H-doner<br>H-doner | 2.99<br>2.81    | TYR 341            | H-pi           | 3.81            | Tyr 71, Glu 80, Trp 83, Gly 117, Gly 118,<br>Thr 121, Glu 204, Ser 205, Tyr 291, Leu 295,<br>Phe 297, Tyr 337, Phe 338, Leu 446, and His<br>447                                                                                                                                                                                                                                                                                                                                                             |
| Rosmarinic<br>acid gluco-<br>side | -9.4433                  | -                       | -                  | -               | Trp 439            | H-pi           | 4.52            | Tyr 71, Gly 116, Gly 117, Gly 118, Thr 121,<br>Leu 126, Tyr 129, Glu 204, Ser 205, Trp 288,<br>Tyr 291, Phe 297, Phe 338, Tyr 341, Asp 342,<br>Leu 446, His 447, Gly 448, Asp 449, and Ile<br>451                                                                                                                                                                                                                                                                                                           |
|                                   |                          |                         |                    |                 | Trp 83             | pi-pi          | 3.65            |                                                                                                                                                                                                                                                                                                                                                                                                                                                                                                             |
|                                   |                          |                         |                    |                 | Trp 337            | pi-pi          | 3.76            |                                                                                                                                                                                                                                                                                                                                                                                                                                                                                                             |
| Salvianolic<br>acid A             | -9.2815                  | -                       | -                  | -               | Tyr 71             | H-pi           | 4.02            | Tyr 71, Glu 80, Asn 84, Gly 116, Gly 117,<br>Thr 121, Tyr 129, Glu 204, Ser 205, Trp 288,<br>Tyr 291, Phe 297, Tyr 337, Phe 338, Tyr 341,<br>Asp 342, Leu 446, His 447, and Gly 448                                                                                                                                                                                                                                                                                                                         |
|                                   |                          |                         |                    |                 | Trp 83             | pi-pi          | 3.40            |                                                                                                                                                                                                                                                                                                                                                                                                                                                                                                             |
|                                   |                          |                         |                    |                 | Tyr 337            | pi-pi          | 3.94            |                                                                                                                                                                                                                                                                                                                                                                                                                                                                                                             |

A.A= Amino acid

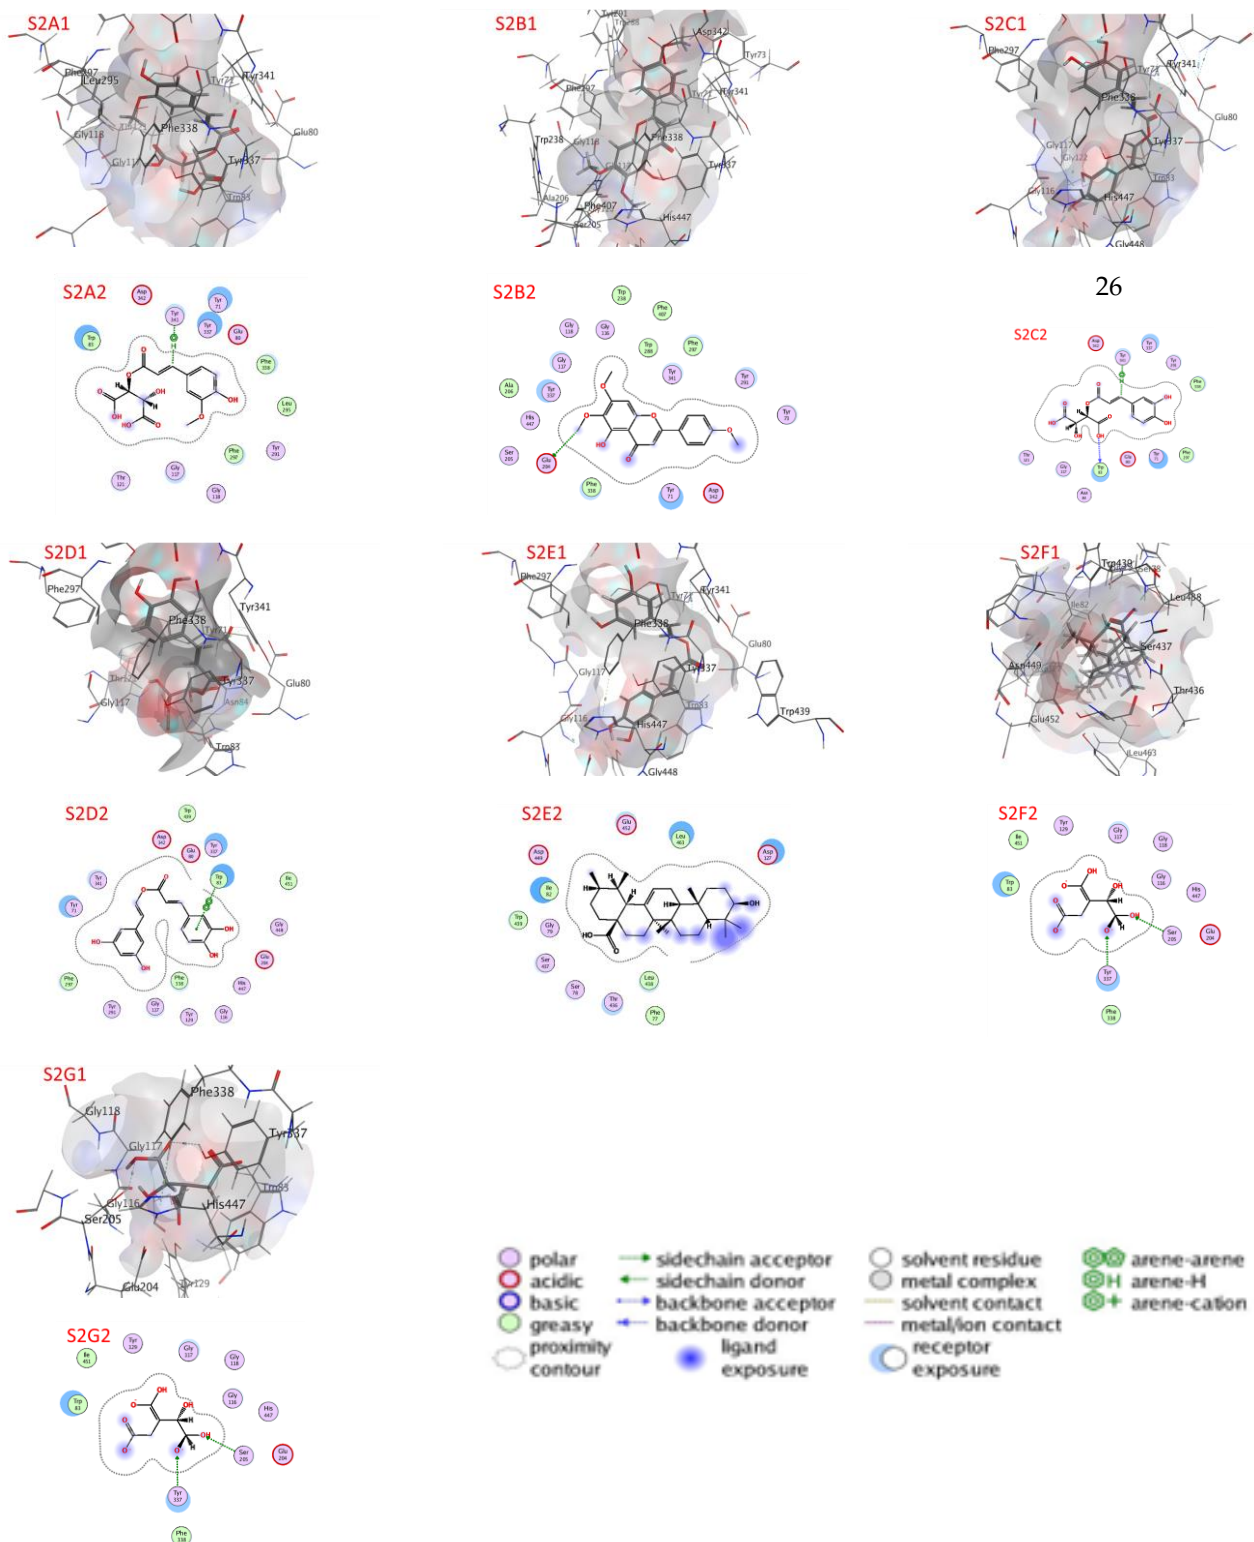

**Figure S2.** A docking image of the binding sites of Acetylcholinesterase AChE (1QON) with fertaric acid, (S2A1,2), salvigenin (S2B1,2), nepetoidin B (S2C1,2), caftaric acid (S2D1,2), nepetoidin A (S2E1,2), ursolic acid (S2F1,2), and isocitric acid (S2G1,2). Complex three-dimensional (stereoview) structures (S2A1,S2B1,S2C1,S2D1,S2E1,S2F1,S2G1,2) and two-dimensional (S2A2,S2B2,S2C2,S2D2,S2E2,S2F2,S2G2) interaction maps.

**Table S3.** Docking values and binding interactions of compounds with acid phosphatase (ACP) (PDB: 3IT3)

| Compounds                 | $\Delta G$<br>(kcal/mol) | H-bond (donor-Acceptor) |             |                 | H-pi or pi-pi bond |                |                 | van der Waals                                                                                                                                                        |
|---------------------------|--------------------------|-------------------------|-------------|-----------------|--------------------|----------------|-----------------|----------------------------------------------------------------------------------------------------------------------------------------------------------------------|
|                           |                          | Ligand<br>A. A.         | interaction | Distance<br>(Å) | Ligand<br>A.A      | interaction    | Distance<br>(Å) |                                                                                                                                                                      |
| Chicoric acid             | -9.4951                  | -                       | -           | -               | TYR 130            | pi-pi          | 3.55            | Arg 11, His 12, Arg 15, Phe 18, Arg 79, Gln 127, Tyr 133, Leu 134, Tyr 142, Asn 173, Thr 177, Asp 180, Leu 212, Gln 215, His 255, Ala 256, and Leu 257               |
| Quercetin-3-O-rutinoside  | -8.8978                  | -                       | -           | -               | Phe 18             | pi-pi          | 3.53            | Leu 32, Ser 33, Thr 77, Arg 79, Ala 121, Gln 127, Tyr 133, Leu 212, His 255, and Leu 257                                                                             |
|                           |                          |                         |             |                 | Tyr 130            | pi-pi          | 3.65            |                                                                                                                                                                      |
| Salvianolic acid B        | -9.5805                  | Ala 256                 | H-Acceptor  | 3.18            | Phe 18             | pi-pi          | 3.55            | Arg 11, His 12, Arg 15, Ser 33, Glu 34, His 76, Thr 77, Asn 78, Arg 79, Ala 121, Gln 127, Glu 131, Ile 176, Thr 177, Asp 180, Leu 212, His 255, Ala 256, and Leu 257 |
|                           |                          |                         |             |                 | Tyr 130            | pi-pi          | 3.99            |                                                                                                                                                                      |
| Fertaric acid             | -7.3173                  | Ala 256                 | H-Acceptor  | 3.23            | Phe 18             | pi-pi          | 3.95            | Arg 11, His 12, Arg 15, Arg 79, Gln 127, Tyr 133, Asp 180, Leu 212, His 255, Ala 256, and Leu 257                                                                    |
|                           |                          |                         |             |                 | Tyr 130            | pi-pi          | 3.49            |                                                                                                                                                                      |
| Rosmarinic acid glucoside | -7.6360                  | -                       | -           | -               | -                  | -              | -               | Phe 18, Thr 77, Arg 79, Gln 127, Tyr 130, Leu 134, Tyr 142, Arg 168, Asn 173, Asp 174, Ile 176, and Thr 177                                                          |
| Salvianolic acid A        | -8.3457                  | His 12                  | H-doner     | 2.95            | Phe 18<br>Tyr 130  | pi-pi<br>pi-pi | 3.69<br>3.60    | Arg 15, His 76, Thr 77, Arg 79, Ser 120, Ala 121, Ser 123, Gln 127, Phe 128, Pro 129, Tyr 133, Asp 180, Leu 212, His 255, and Leu 257                                |
|                           |                          | Arg 11                  | H-acceptor  | 3.21            |                    |                |                 |                                                                                                                                                                      |
|                           |                          | Ala 256                 | H-acceptor  | 3.18            |                    |                |                 |                                                                                                                                                                      |

A.A= Amino acid

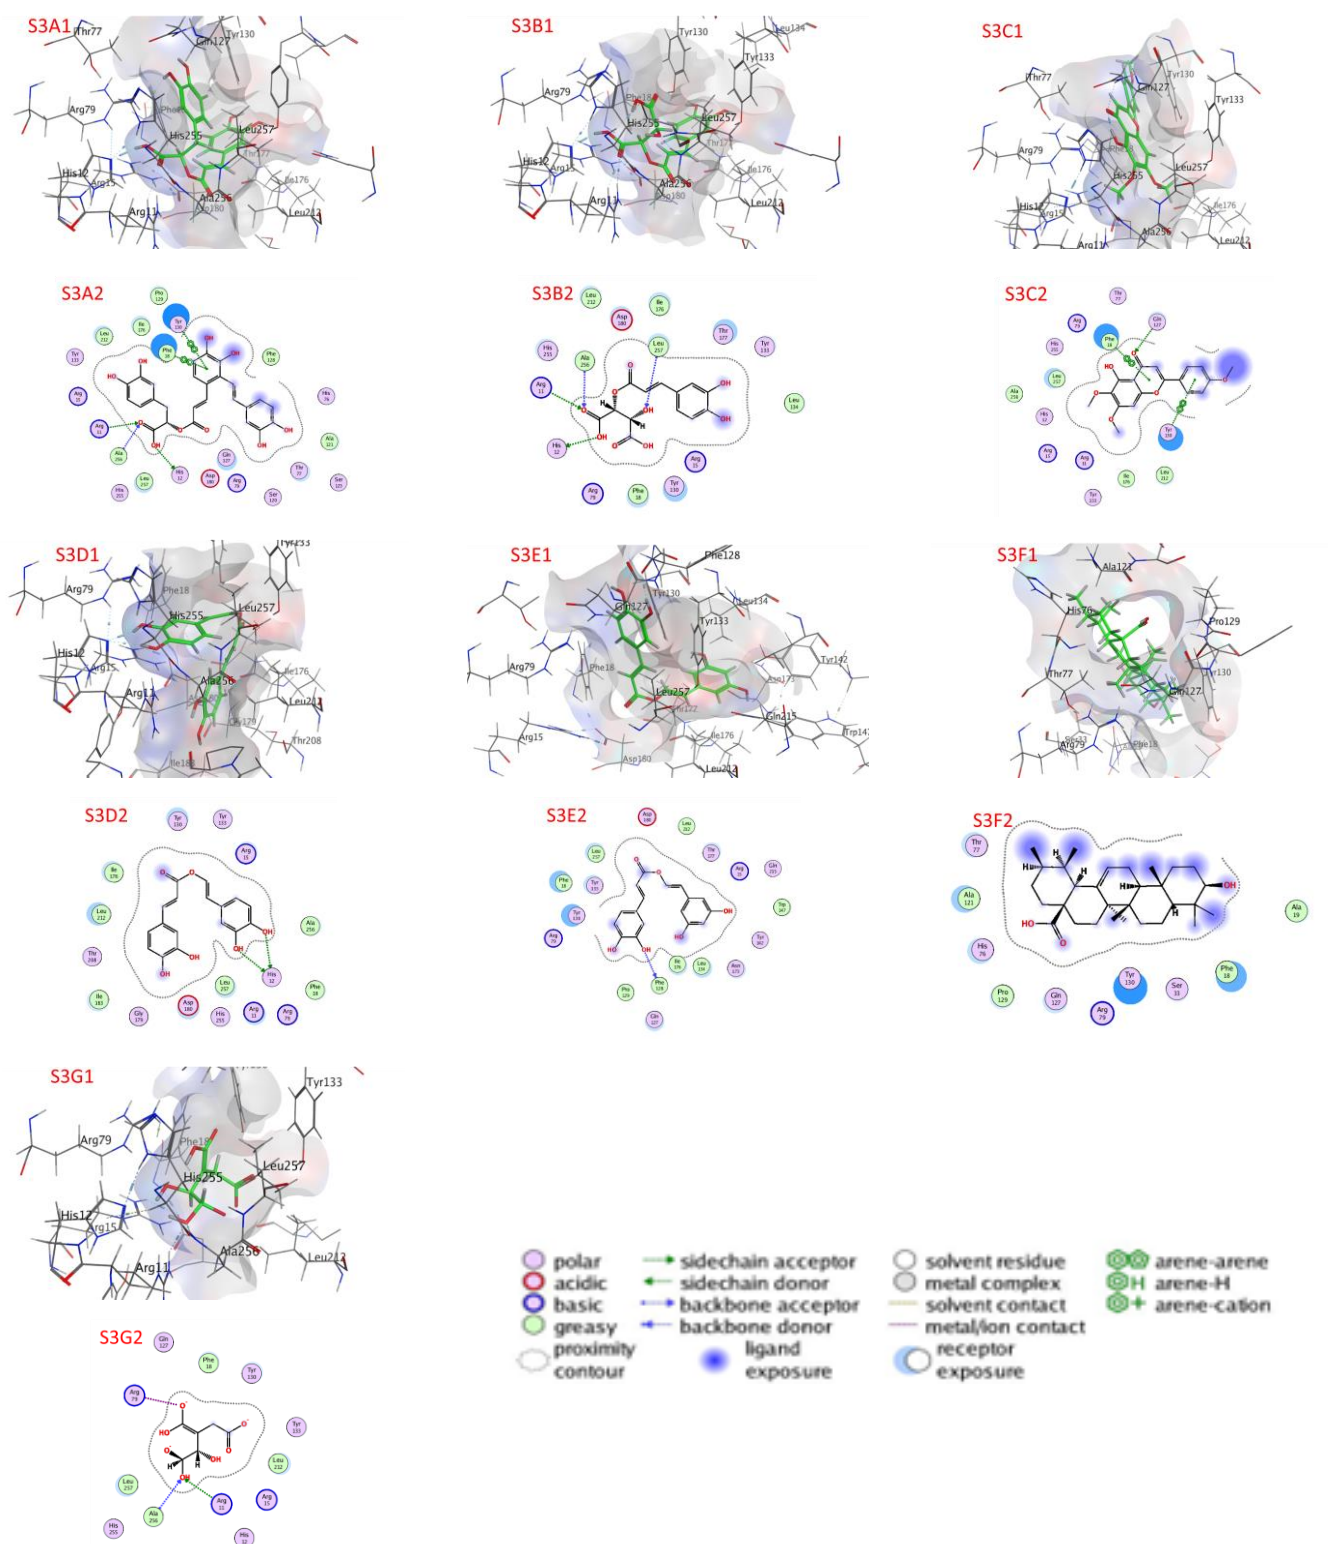

**Figure S3.** A docking image of the binding sites of Acid phosphatase (ACP) (3IT3) with rosmarinic acid B (S3A1,2), caftaric acid (S3B1,2), salvigenin (S3C1,2), nepetoidin B (S3D1,2), nepetoidin A (S3E1,2), ursolic acid (S3F1,2), and isocitric acid (S3G1,2). Complex three-dimensional (stereoview) structures (S3A1,S3B1,S3C1,S3D1,S3E1,S3F1,S3G1) and two-dimensional (S3A2,S3B2,S3C2,S3D2,S3E2,S3F2,S3G2) interaction maps.



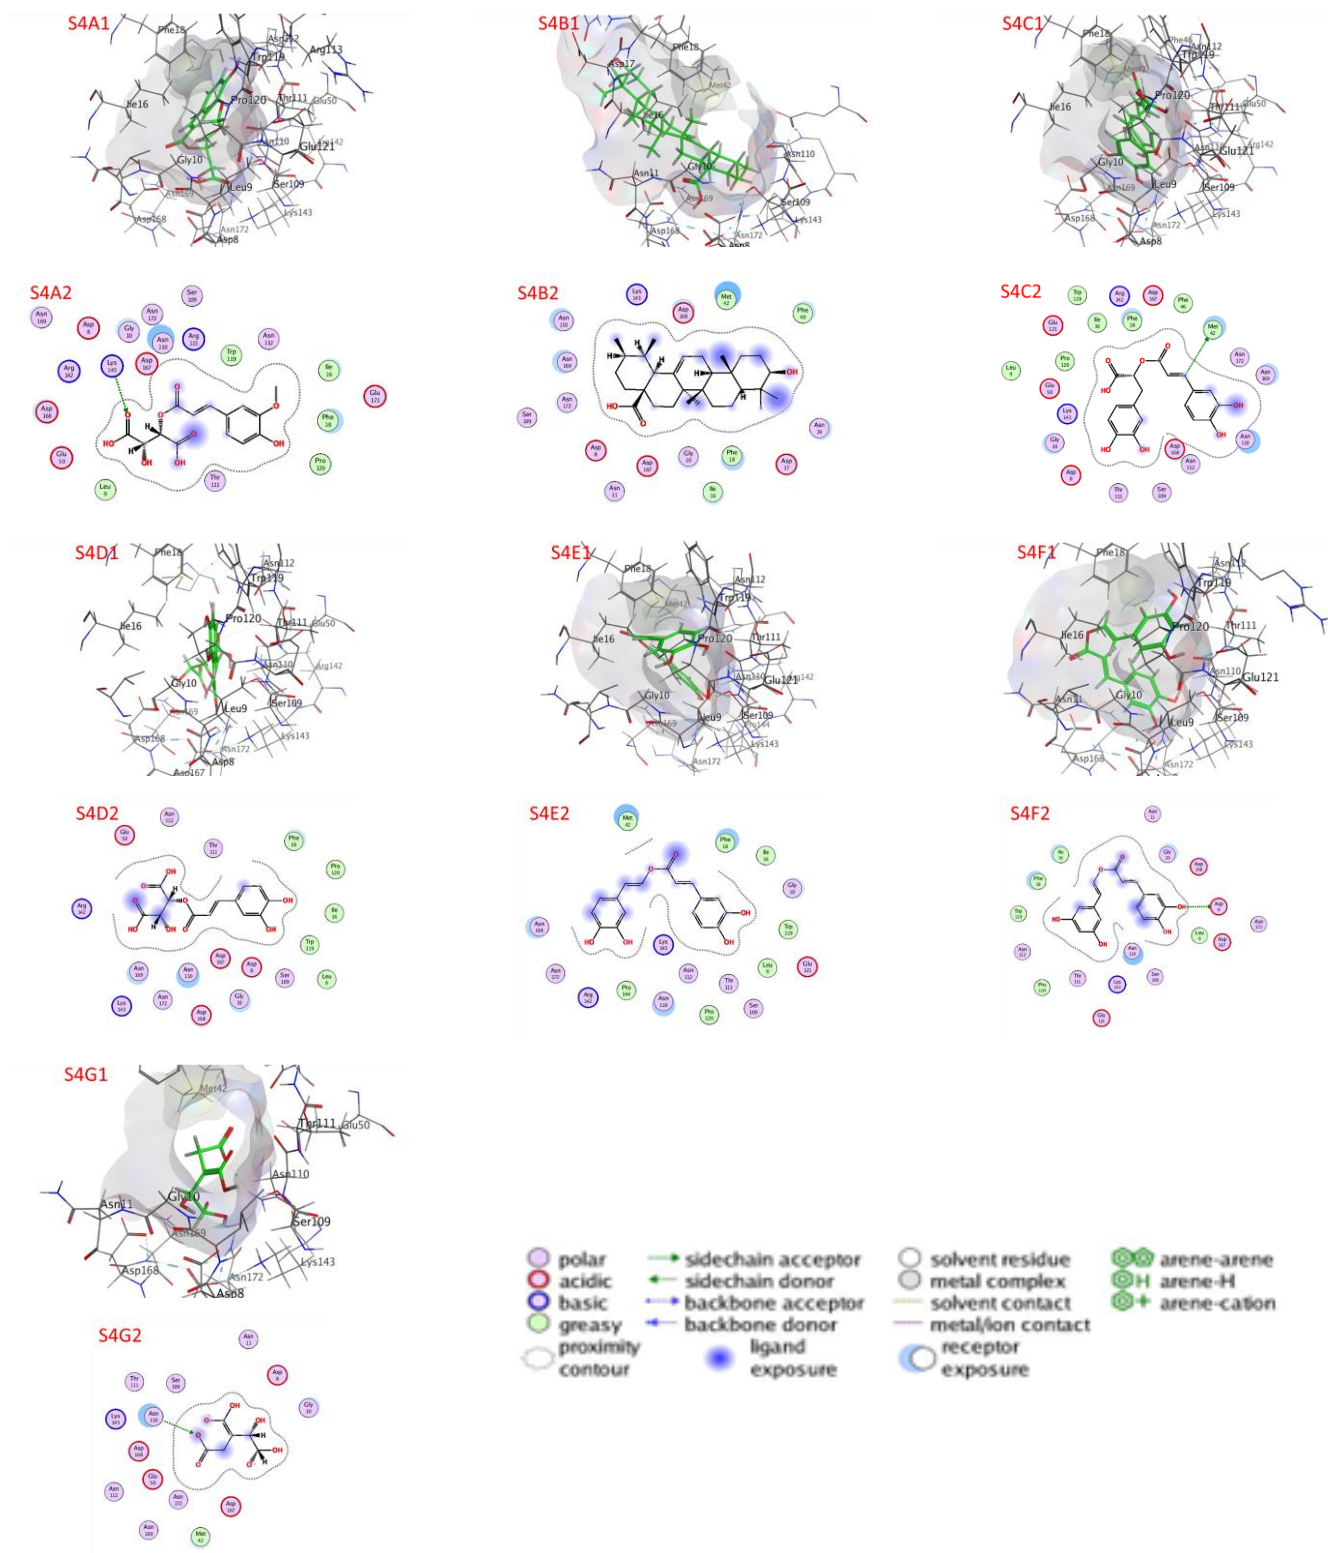

**Figure S4.** A docking image of the binding sites of Alkaline phosphatase (ALP) (2B0C) with fertaric acid (S4A1,2), ursolic acid (S4B1,2), rosmarinic acid (S4C1,2), caftaric acid (S4D1,2), nepetoidin B (S4E1,2), nepetoidin A (S4F1,2), and isocitric acid (GS41,2). Complex three-dimensional (stereoview) structures (S4A1,S4B1,S4C1,S4D1,S4E1,S4F1,S4G1) and two-dimensional (S4A2,S4B2,S4C2,S4D2,S4E2,S4F2,S4G2) interaction maps.

**Table S4.** Docking values and binding interactions of compounds with alkaline phosphatase (ALP) (PDB: 2B0C)

| Compounds                 | $\Delta G$<br>(kcal/mol) | H-bond (donor-Acceptor) |             |                 | H-pi or pi-pi bond |             |                 | van der Waals                                                                                                                                                                                        |
|---------------------------|--------------------------|-------------------------|-------------|-----------------|--------------------|-------------|-----------------|------------------------------------------------------------------------------------------------------------------------------------------------------------------------------------------------------|
|                           |                          | Ligand<br>A. A.         | interaction | Distance<br>(Å) | Ligand<br>A.A      | interaction | Distance<br>(Å) |                                                                                                                                                                                                      |
| Chicoric acid             | -7.5352                  | Phe 18                  | H-acceptor  | 3.30            | -                  | -           | -               | Asp 8, Leu 9, Gly 10, Asn 11, Ile 16, Asp 17, Asn 19, Phe 40, Met 42, Phe 46, Ser 109, Asn 110, Thr 111, Asn 112, Glu 121, Lys 143, Asp 167, Asp 168, Asn 169, and Asn 172                           |
| Quercetin-3-O-rutinoside  | -8.9556                  | Asn 110                 | H-doner     | 3.26            | -                  | -           | -               | Asp 8, Gly 10, Asn 11, Ile 16, Phe 18, Phe 40, Met 42, Ser 109, Thr 111, Asn 112, Trp 119, Arg 142, Pro 144, Asp 168, Asn 169, Asp 171, and Asn 172                                                  |
|                           |                          | Asp 167                 | H-doner     | 3.07            |                    |             |                 |                                                                                                                                                                                                      |
|                           |                          | Asn 110                 | H-acceptor  | 2.99            |                    |             |                 |                                                                                                                                                                                                      |
|                           |                          | Lys 143                 | H-acceptor  | 3.38            |                    |             |                 |                                                                                                                                                                                                      |
| Salvianolic acid B        | -8.8400                  | Met 42                  | H-doner     | 3.74            | Phe 18             | pi-pi       | 3.69            | Gly 10, Asn 11, Ile 16, Asp 17, Asn 19, Phe 40, Phe 46, His 47, Glu 50, Ser 109, Asn 110, The 111, Asn 112, Trp 119, Arg 142, Asp 167, Asn 169, and Asn 172                                          |
|                           |                          | Asp 8                   | H-doner     | 3.10            |                    |             |                 |                                                                                                                                                                                                      |
|                           |                          | Asp 168                 | H-doner     | 3.09            |                    |             |                 |                                                                                                                                                                                                      |
| Salvigenin                | -7.6869                  | -                       | -           | -               | Thr 111            | pi-H        | 4.31            | Asp 8, Leu 9, Gly 10, Thr 11, Asn 12, Ile 16, Phe 18, Met 42, Phe 46, His 47, Glu 50, Ser 109, Asn 110, Asn 112, Trp 119, Pro 120, Arg 142, Lys 143, Pro 144, Asp 167, Asp 168, Asn 169, and Asn 172 |
| Rosmarinic acid glucoside | -7.7995                  | Asn 110                 | H-doner     | 3.01            | -                  | -           | -               | Asp 8, Leu 9, Gly 10, Asn 11, Ile 16, Phe 18, Asn 19, Lys 37, Phe 40, Met 42, Ser 109, Thr 111, Asn 112, Trp 119, Lys 143, Asp 167, Asn 169, and Asn 172                                             |
|                           |                          | Asp 168                 | H-doner     | 3.08            |                    |             |                 |                                                                                                                                                                                                      |
| Salvianolic acid A        | -8.0411                  | -                       | -           | -               | -                  | -           | -               | Leu 9, Gly 10, Ile 16, Asp 17, Phe 18, Met 42, Glu 50, Ser 109, Asn 110, The 111, Asn 112, Trp 119, Glu 121, Arg 142, Lys 143, Pro 144, Asp 167, Asp 168, Asn 169, and Asn 172.                      |

A.A= Amino acid

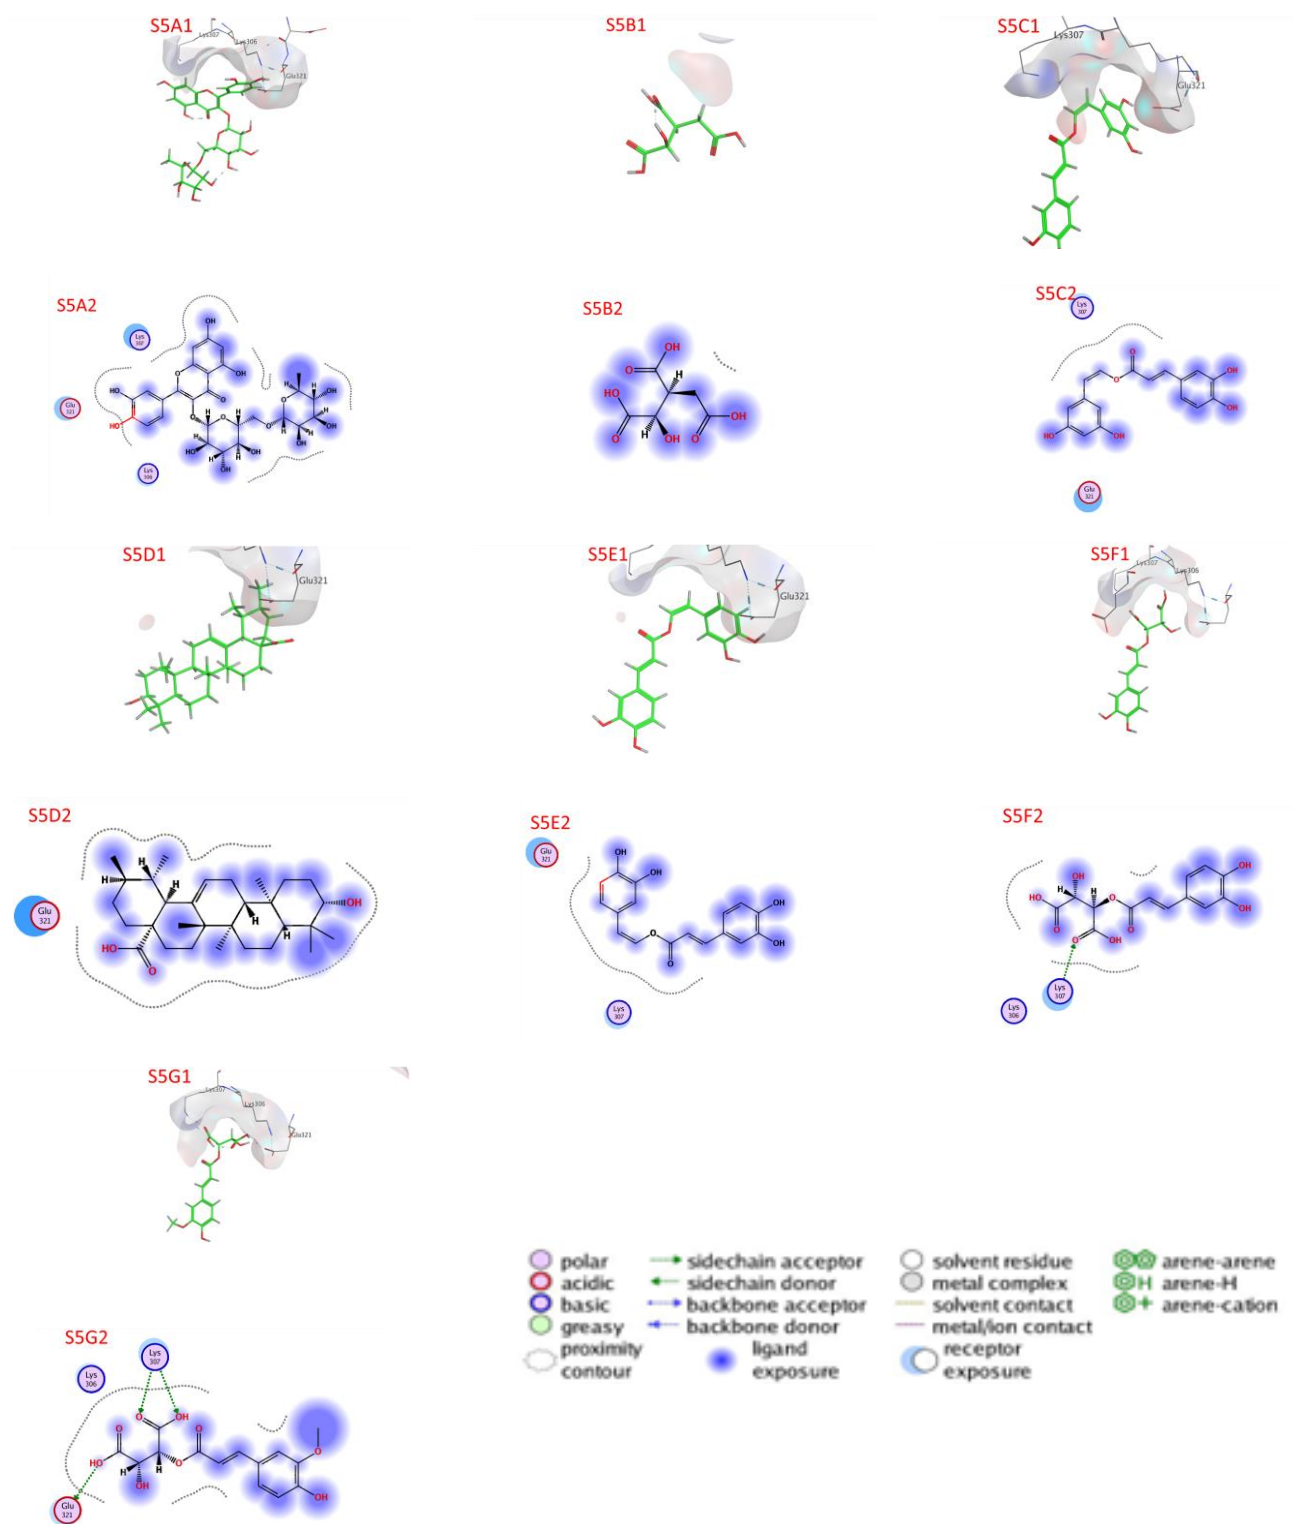

**Figure S5.** A docking image of the binding sites of Gamma-aminobutyric acid-transaminase (GABA-T) (3IP9) with quercetin-3-O-rutinoside (S5A1,2), isocitric acid (S5B1,2), nepetoidin A (S5C1,2), ursolic acid (S5D1,2), nepetoidin B (S5E1,2), caftaric acid (S5F1,2), and feticaric acid (S5G1,2). Complex three-dimensional (stereoview) structures (S5A1,S5B1,S5C1,S5D1,S5E1,S5F1,S5G1) and two-dimensional (S5A2,S5B2,S5C2,S5D2,S5E2,S5F2,S5G2) interaction maps



**Table S5.** Docking values and binding interactions of compounds with alkaline phosphatase (GABA-T) (PDB: 3IP9)

| Compounds                         | $\Delta G$<br>(kcal/mol) | H-bond (donor-Acceptor) |             |                 | H-pi or pi-pi bond |             |                 | van der Waals                                                                 |
|-----------------------------------|--------------------------|-------------------------|-------------|-----------------|--------------------|-------------|-----------------|-------------------------------------------------------------------------------|
|                                   |                          | Ligand<br>A. A.         | interaction | Distance<br>(Å) | Ligand<br>A.A      | interaction | Distance<br>(Å) |                                                                               |
| Chicoric acid                     | -4.8675                  | Ala 302                 | H-doner     | 2.87            | -                  | -           | -               | Glu 303, Leu 305, Lys 306, Lys 307, Phe 115,<br>Phe 319, Asp 320, and Glu 321 |
| rosmarinic<br>acid                | -4.9175                  | Lys 307                 | H-acceptor  | 3.31            | -                  | -           | -               | Glu 303, Lys 306, and Glu 321                                                 |
| Salvianolic<br>acid B             | -5.7478                  | Lys 307                 | H-acceptor  | 3.65            | -                  | -           | -               | Lys 306 and Glu 312                                                           |
| Salvigenin                        | -7.1403                  | -                       | -           | -               | -                  | -           | -               | Lys 306 and Glu 312                                                           |
| Rosmarinic<br>acid gluco-<br>side | -                        | -                       | -           | -               | -                  | -           | -               | Glu 321                                                                       |
| Salvianolic<br>acid A             | -5.3285                  | -                       | -           | -               | -                  | -           | -               | Glu 303, Lys 306, and Glu 312                                                 |

A.A= Amino acid

**Table S6.** Experimental chemicals' ADMET evaluation.

| Compounds                 | HBD | HBA | LogP   | LogS<br>( $\mu\text{g/mL}$ ) | BBB | PPB | CYP450 2D6<br>substrate | H-HT | TPSA   |
|---------------------------|-----|-----|--------|------------------------------|-----|-----|-------------------------|------|--------|
| rosmarinic acid           | 5   | 7   | 1.761  | 96.535                       | ++  | +   | +                       | +    | 144.52 |
| Nepetoidin A              | 4   | 5   | 2.736  | 47.026                       | -   | +   | -                       | +    | 107.22 |
| Nepetoidin B              | 4   | 6   | 2.736  | 47.026                       | -   | +   | -                       | +    | 107.22 |
| Ursolic acid              | 2   | 2   | 7.09   | 0.187                        | ++  | +   | -                       | ---  | 57.53  |
| Salvigenin                | 1   | 6   | 3.191  | 44.905                       | +   | +   | ++                      | ++   | 78.13  |
| Quercetin-3-O-rutinoside  | 10  | 16  | -1.687 | 315.283                      | --- | +   | ---                     | ---  | 269.43 |
| Rosmarinic acid glucoside | 8   | 13  | -0.98  | 473.208                      | --- | +   | +                       | -    | 223.67 |
| chicoric acid             | 6   | 10  | 1.228  | 97.526                       | +   | +   | -                       | -    | 208.12 |
| Isocitric acid            | 4   | 7   | -1.393 | 42518                        | +++ | +   | -                       | -    | 132.13 |
| Caftaric acid             | 5   | 7   | -0.447 | 1847.003                     | -   | +   | -                       | +    | 161.59 |
| Fertaric acid             | 4   | 7   | -0.144 | 2520.924                     | -   | +   | +                       | ++   | 150.59 |
| Salvianolic acid A        | 7   | 9   | 3.343  | 11.916                       | +   | +   | -                       | -    | 184.98 |
| Salvianolic acid B        | 9   | 14  | 3.335  | 34.08                        | ++  | +   | +                       | ---  | 278.04 |

HBD, HBA: hydrogen bond donor and acceptor; LogS: Solubility; LogP: Distribution Coefficient P; PPB: Plasma Protein Binding; BBB: Blood-Brain Barrier; H-HT: Human Hepatotoxicity. LogS: optimal, low, moderate, and high solubility with value > -4, <10, 10-60, >60  $\mu\text{g/mL}$ ; LogP: optimal, poor lipid bilayer permeability, poor aqueous solubility with value 0-3, <0, and >3; BBB+ or - with  $\geq 0.1$ , <0.1; classification of models & probability 0~0.1 (---), 0.1~0.3 (--), 0.3~0.5 (-), 0.5~0.7 (+), 0.7~0.9 (++), 0.9~1 (+++).
